# Supplementary material
Source: PubMed Central journal article supplement (PMC7450400)
Supplement: jamacardiol-e203377-s001.pdf [file jamacardiol-e203377-s001.pdf]

## Supplementary Online Content

Farhan S, Vogel B, Montalescot G, et al. Association of culprit lesion location with outcomes of culprit-lesion-only vs immediate multivessel percutaneous coronary intervention in cardiogenic shock. *JAMA Cardiol*. Published online August 26, 2020. doi:10.1001/jamacardio.2020.3377

**eTable 1.** Baseline clinical and procedural characteristics in patients with left main or proximal left anterior descending artery culprit lesion versus other culprit lesion location

**eTable 2.** Multivariate adjusted analysis for risk of 30-day and 1-year endpoints in patients with left main or proximal left anterior descending artery culprit lesion versus other culprit lesion location

This supplementary material has been provided by the authors to give readers additional information about their work.

**Supplementary Table 1.** Baseline clinical and procedural characteristics in patients with left main or proximal left anterior descending artery culprit lesion versus other culprit lesion location.

| Characteristic                                                       | LM/pLAD<br>(n=229) | Other culprit<br>lesion locations<br>(n=456) | P-value |
|----------------------------------------------------------------------|--------------------|----------------------------------------------|---------|
| Age, years                                                           | 69 (59, 78)        | 70 (61, 78)                                  | 0.37    |
| Male sex                                                             | 79 (181/229)       | 75.2 (343/456)                               | 0.27    |
| Current smoking                                                      | 27.4 (61/223)      | 25.9 (113/436)                               | 0.69    |
| Hypertension                                                         | 54 (121/224)       | 63.5 (285/449)                               | 0.018   |
| Hypercholesterinemia                                                 | 31.8 (71/223)      | 35.1 (157/447)                               | 0.40    |
| Diabetes mellitus                                                    | 33.5 (75/224)      | 32 (143/447)                                 | 0.70    |
| Family hx of coronary artery disease                                 | 11 (24/219)        | 13 (56/430)                                  | 0.45    |
| Previous myocardial infarction                                       | 16.1 (36/224)      | 17.1 (77/449)                                | 0.72    |
| Previous PCI                                                         | 15.6 (35/224)      | 20.5 (92/449)                                | 0.13    |
| Previous CABG surgery                                                | 2.2 (5/224)        | 6.2 (28/453)                                 | 0.025   |
| Previous congestive heart failure                                    | 10.3 (23/224)      | 8 (36/452)                                   | 0.32    |
| Previous stroke                                                      | 8.9 (20/225)       | 6.2 (28/451)                                 | 0.20    |
| Resuscitation before randomization                                   | 53.3 (122/229)     | 53.7 (244/454)                               | 0.91    |
| ST-segment elevation myocardial infarction                           | 59.9 (133/222)     | 63.6 (281/442)                               | 0.36    |
| Mean arterial pressure, mmHg                                         | 77 (63, 93)        | 75 (63, 93)                                  | 0.72    |
| Creatinine clearance ml/min                                          | 62 (41, 97)        | 66 (43, 92)                                  | 0.34    |
| Number of affected vessels                                           |                    |                                              | 0.49    |
| 1                                                                    | 0.4 (1/229)        | 0.9 (4/456)                                  |         |
| 2                                                                    | 34.5 (79/229)      | 36.6 (167/456)                               |         |
| 3                                                                    | 65.1 (149/229)     | 62.5 (285/456)                               |         |
| ≥1 Chronic total occlusion                                           | 25.3 (58/229)      | 21.7 (99/456)                                | 0.29    |
| Left ventricular ejection fraction, %                                | 30 (25, 40)        | 35 (25, 45)                                  | 0.047   |
| Arterial access                                                      |                    |                                              |         |
| Femoral                                                              | 79.9 (183/229)     | 83.6 (381/456)                               | 0.24    |
| Radial                                                               | 20.5 (47/229)      | 17.5 (80/456)                                | 0.34    |
| Brachial                                                             | 0.9 (2/229)        | 0.2 (1/456)                                  | 0.22    |
| TIMI III flow before culprit lesion PCI                              | 19.8 (45/227)      | 16.9 (76/449)                                | 0.040   |
| TIMI flow III after culprit lesion PCI                               | 81.1 (185/228)     | 87.8 (397/452)                               | 0.030   |
| Immediate PCI of additional lesions                                  | 52.4 (120/229)     | 51.1 (233/456)                               | 0.75    |
| Successful complete revascularization                                | 71.4 (85/119)      | 73.6 (170/231)                               | 0.75    |
| Total contrast volume, ml                                            | 220 (158, 300)     | 220 (155, 300)                               | 0.94    |
| Total duration of fluoroscopy, min.                                  | 16 (9, 26)         | 16 (10, 24)                                  | 0.69    |
| Mechanical circulatory support                                       | 34.5 (79/229)      | 25.2 (115/456)                               | 0.011   |
| Mechanical ventilation                                               | 83.7 (190/227)     | 80 (364/455)                                 | 0.24    |
| Subsequent medication in those who survived until hospital discharge |                    |                                              |         |

|                                                                                                                                                                                                               |               |                |      |
|---------------------------------------------------------------------------------------------------------------------------------------------------------------------------------------------------------------|---------------|----------------|------|
| Statin                                                                                                                                                                                                        | 92.3 (96/104) | 90.6 (231/255) | 0.60 |
| Beta-blocker                                                                                                                                                                                                  | 90.4 (94/104) | 89.0 (227/255) | 0.70 |
| ACE/ARB                                                                                                                                                                                                       | 84.6 (88/104) | 80.0 (204/255) | 0.31 |
| Aspirin                                                                                                                                                                                                       | 92.3 (96/104) | 92.9 (237/255) | 0.83 |
| Clopidogrel                                                                                                                                                                                                   | 40.4 (42/104) | 39.2 (100/255) | 0.84 |
| Prasugrel                                                                                                                                                                                                     | 26.9 (28/104) | 31.0 (79/255)  | 0.45 |
| Ticagrelor                                                                                                                                                                                                    | 31.7 (33/104) | 34.9 (89/255)  | 0.56 |
| Values are median (interquartile range) or % (n/N). ACE/ARB, angiotensin converting enzyme/angiotensin receptor blocker; PCI, percutaneous coronary intervention; CABG, coronary artery bypass graft surgery. |               |                |      |

**Supplementary Table 2:** Multivariate adjusted analysis for risk of 30-day and 1-year endpoints in patients with left main or proximal left anterior descending artery culprit lesion versus other culprit lesion location.

| <b>Endpoints</b>                                                                   | Odds ratios<br>(95% CI) | P-value |
|------------------------------------------------------------------------------------|-------------------------|---------|
| Primary endpoint of death or renal replacement therapy                             | 1.37 (0.98-1.90)        | 0.065   |
| Death at 30 days                                                                   | 1.45 (1.04-2.02)        | 0.028   |
| MI at 30 days                                                                      | NA**                    |         |
| Death or MI at 30 days                                                             | 1.49 (1.07-2.08)        | 0.018   |
| Death or MI or rehospitalization for heart failure at 1 year                       | 1.43 (1.02-2.00)        | 0.036   |
| Death or MI at 1 year                                                              | 1.48 (1.06-2.06)        | 0.022   |
| Death or rehospitalization for heart failure at 1 year                             | 1.42 (1.01-1.98)        | 0.042   |
| Death at 1 year                                                                    | 1.46 (1.05-2.04)        | 0.0257  |
| MI at 1 year                                                                       | NA***                   |         |
| MI: myocardial infarction; NA not applicable; ** only 7 events, *** only 13 events |                         |         |
